# Supplementary material for: Disruption of COMMD1 accelerates diabetic atherosclerosis by promoting glycolysis
Source: PubMed Central journal article supplement — Diab Vasc Dis Res. 2023 Feb 19;20(1):14791641231159009. doi: 10.1177/14791641231159009 (PMC9941604; doi:10.1177/14791641231159009), 2023-02-19
Supplement: sj-pdf-1-dvr-10.1177_14791641231159009.pdf [file sj-pdf-1-dvr-10.1177_14791641231159009.pdf]

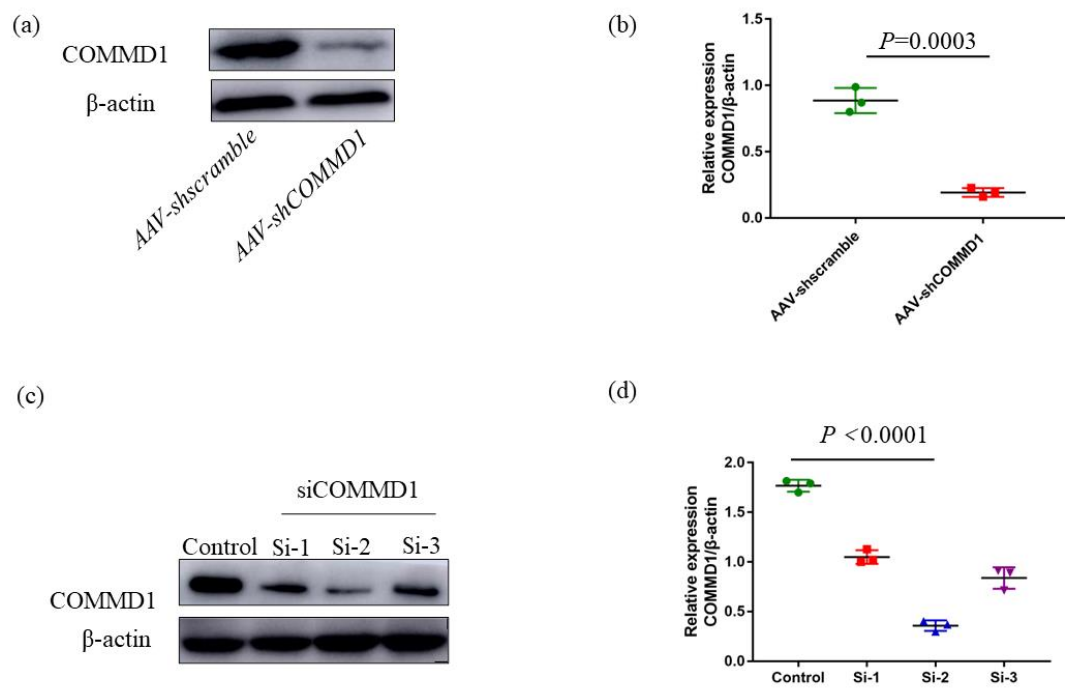

**Figure S1.** (a-b) The infection efficiency of COMMD1 knockdown. (c-d) siRNA knockdown efficiency for siCOMMD1
